# Supplementary material
Source: publisher site journal article supplement (https://www.dovepress.com/article/557781)
Supplement: Supplementary file 1 [file 557781%20supplementary%20files_1.pdf]

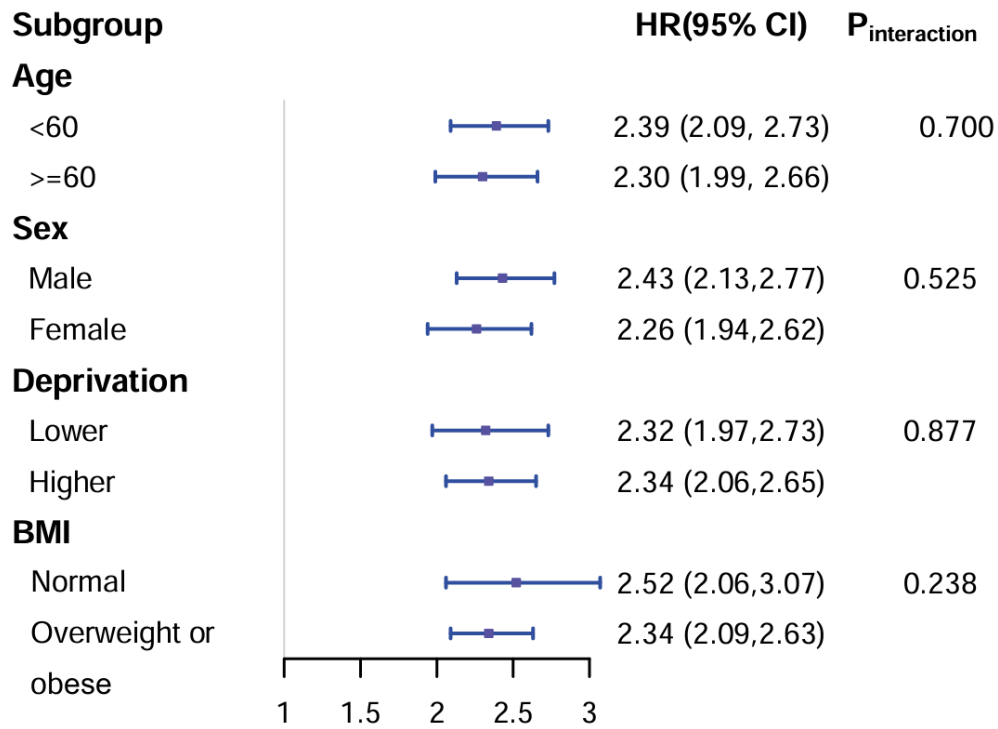

**Figure S1.** Subgroup analysis of association of substance abuse with the risk of psoriasis.

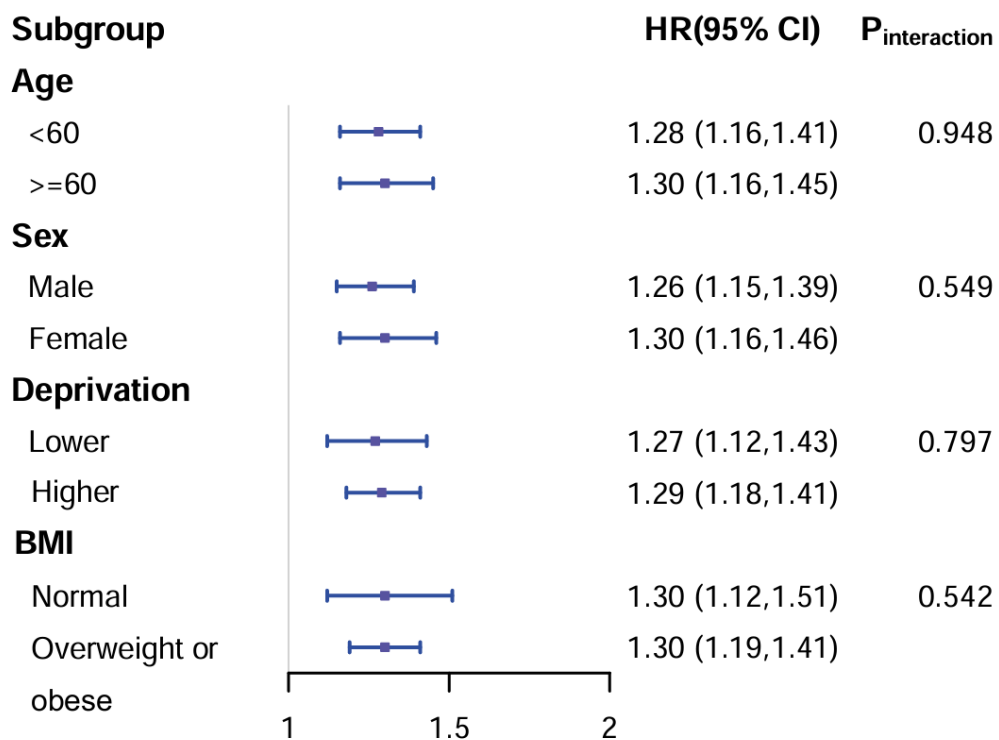

**Figure S2.** Subgroup analysis of association of psoriasis with the risk of incident substance abuse.

**Table S1** Baseline characteristic of the study participants by substance abuse in Cohort 2.

| Variable                        | Total         | Non-Psoriasis | Psoriasis    | <i>P</i> |
|---------------------------------|---------------|---------------|--------------|----------|
| N                               | 451547        | 442217        | 9330         |          |
| Sex, n (%)                      |               |               |              | <0.001   |
| Male                            | 203605 (45.1) | 198871(45.0)  | 4734(50.7)   |          |
| Female                          | 247942 (54.9) | 243346 (55.0) | 4596(49.3)   |          |
| Age (y), mean (SD)              | 56.48 (8.09)  | 56.48 (8.09)  | 56.79 (7.99) | <0.001   |
| TDI, mean (SD)                  | -1.42 (3.02)  | -1.43 (3.02)  | -1.30 (3.05) | <0.001   |
| Ethnicity, n (%)                |               |               |              | <0.001   |
| White                           | 429048 (95.0) | 419980 (95.0) | 9068 (97.2)  |          |
| Mixed                           | 2597 (0.6)    | 2550 (0.6)    | 47 (0.5)     |          |
| Asian                           | 7905 (1.8)    | 7775 (1.8)    | 130 (1.4)    |          |
| Black                           | 6842 (1.5)    | 6817 (1.5)    | 25 (0.3)     |          |
| Chinese                         | 1373 (0.3)    | 1364 (0.3)    | 9 (0.1)      |          |
| Other                           | 3782 (0.8)    | 3731 (0.8)    | 51 (0.5)     |          |
| Education, n (%)                |               |               |              | <0.001   |
| College degree                  | 153019 (33.9) | 149952 (33.9) | 3067 (32.9)  |          |
| A-levels                        | 51881 (11.5)  | 50855 (11.5)  | 1026 (11.0)  |          |
| O-levels                        | 97395 (21.6)  | 95396 (21.6)  | 1999 (21.4)  |          |
| CSEs                            | 24151 (5.3)   | 23636 (5.3)   | 515 (5.5)    |          |
| NVQ/HND/HNC                     | 29390 (6.5)   | 28721 (6.5)   | 669 (7.2)    |          |
| Other                           | 23744 (5.3)   | 23299 (5.3)   | 445 (4.8)    |          |
| None of the above               | 71967 (15.9)  | 70358 (15.9)  | 1609 (17.2)  |          |
| Smoking, n (%)                  |               |               |              | <0.001   |
| Never                           | 257923 (57.1) | 253399 (57.3) | 4524 (48.5)  |          |
| Previous                        | 156092 (34.6) | 152233 (34.4) | 3859 (41.4)  |          |
| Current                         | 37532 (8.3)   | 36585 (8.3)   | 947 (10.2)   |          |
| Alcohol, n (%)                  |               |               |              | <0.001   |
| Never                           | 19101 (4.2)   | 18759 (4.2)   | 342 (3.7)    |          |
| Previous                        | 14717 (3.3)   | 14352 (3.2)   | 365 (3.9)    |          |
| Current                         | 417729 (92.5) | 409106 (92.5) | 8623 (92.4)  |          |
| BMI (kg/m <sup>2</sup> ), n (%) |               |               |              | <0.001   |
| Underweight                     | 2265 (0.5)    | 2230 (0.5)    | 35 (0.4)     |          |
| Normal weight                   | 149084 (33.0) | 146561 (33.1) | 2523 (27.0)  |          |
| Overweight                      | 192439 (42.6) | 188439 (42.6) | 4000 (42.9)  |          |
| Obese                           | 107759 (23.9) | 104987 (23.7) | 2772 (29.7)  |          |
| Regular exercise, n (%)         | 176667 (39.1) | 173135 (39.2) | 3532 (37.9)  | 0.012    |
| Substance abuse, n (%)          | 25176 (5.6)   | 24423 (5.5)   | 753 (8.1)    | <0.001   |
| Alcohol abuse                   | 6977 (1.5)    | 6747 (1.5)    | 230 (2.5)    | <0.001   |
| Tobacco abuse                   | 19452 (4.3)   | 18884 (4.3)   | 568 (6.1)    | <0.001   |
| Other substance abuse           | 483 (0.1)     | 467 (0.1)     | 16 (0.2)     | 0.077    |

**Table S2** Mediation effect of symptoms of variables

| Mediation variables | Proportion mediated (95% CI) | <i>P</i> value |
|---------------------|------------------------------|----------------|
| Depression symptoms | 0.017 (0.007, 0.030)         | <0.001         |
| Anxiety symptoms    | 0.034 (0.026, 0.060)         | <0.001         |
| Poor sleep quality  | 0.018 (0.011, 0.030)         | <0.001         |

**Table S3** Association of substance abuse with the risk of psoriasis (Excluding substance abuse cases that occurred within the first two years in Cohort 1).

| Exposures                | Cases/person-years | Cases/100 person-years <sup>a</sup> | Unadjusted Model  |          | Adjusted Model 1 <sup>b</sup> |          | Adjusted Model 2 <sup>c</sup> |          |  |
|--------------------------|--------------------|-------------------------------------|-------------------|----------|-------------------------------|----------|-------------------------------|----------|--|
|                          |                    |                                     | HR (95% CI)       | <i>P</i> | HR (95% CI)                   | <i>P</i> | HR (95% CI)                   | <i>P</i> |  |
| Substance abuse          |                    |                                     |                   |          |                               |          |                               |          |  |
| No                       | 3011 of 5631845    | 0.5                                 | Ref               |          | Ref                           |          | Ref                           |          |  |
| Yes                      | 342 of 277125      | 1.2                                 | 2.29 (2.05, 2.56) | <0.001   | 2.15 (1.92, 2.41)             | <0.001   | 2.15 (1.92, 2.41)             | <0.001   |  |
| Types of substance abuse |                    |                                     |                   |          |                               |          |                               |          |  |
| Alcohol                  |                    |                                     |                   |          |                               |          |                               |          |  |
| No                       | 3297 of 5868202    | 0.6                                 | Ref               |          | Ref                           |          | Ref                           |          |  |
| Yes                      | 56 of 40768        | 1.4                                 | 2.44 (1.88, 3.18) | <0.001   | 2.13 (1.63, 2.78)             | <0.001   | 2.13 (1.63, 2.78)             | <0.001   |  |
| Tobacco                  |                    |                                     |                   |          |                               |          |                               |          |  |
| No                       | 3054 of 5669635    | 0.7                                 | Ref               |          | Ref                           |          | Ref                           |          |  |
| Yes                      | 299 of 239335      | 1.6                                 | 2.30 (2.04, 2.59) | <0.001   | 2.16 (1.91, 2.43)             | <0.001   | 2.17 (1.93, 2.45)             | <0.001   |  |
| Other                    |                    |                                     |                   |          |                               |          |                               |          |  |
| No                       | 3347 of 5902367    | 0.6                                 | Ref               |          | Ref                           |          | Ref                           |          |  |
| Yes                      | 6 of 6604          | 0.9                                 | 1.60 (0.72, 3.56) | 0.251    | 1.54 (0.69, 3.43)             | 0.168    | 1.53 (0.69, 3.41)             | 0.299    |  |

CI, confidence interval; HR, hazard ratio.

<sup>a</sup>Presented as events per 1000 person-years.

<sup>b</sup>Adjusted for sex, age, ethnicity, Townsend deprivation score, educational level, physical activity, and body mass index.

<sup>c</sup>Additionally adjusted for polygenic risk scores.

**Table S4** Association of psoriasis with the risk of incident substance abuse (Excluding substance abuse cases occurred within first two years in Cohort 2)

| Outcomes                 | Cases/person-years | Cases per 1000 person-years <sup>a</sup> | Unadjusted Model  |          | Adjusted Model <sup>b</sup> |          |
|--------------------------|--------------------|------------------------------------------|-------------------|----------|-----------------------------|----------|
|                          |                    |                                          | HR (95% CI)       | <i>P</i> | HR (95% CI)                 | <i>P</i> |
| Substance abuse          |                    |                                          |                   |          |                             |          |
| Non-psoriasis            | 21248 of 5615536   | 3.8                                      | Ref               |          | Ref                         |          |
| psoriasis                | 613 of 115038      | 5.3                                      | 1.41 (1.30,1.52)  | <0.001   | 1.21 (1.12,1.31)            | <0.001   |
| Types of substance abuse |                    |                                          |                   |          |                             |          |
| Alcohol                  |                    |                                          |                   |          |                             |          |
| Non-psoriasis            | 5787 of 5719055    | 1.0                                      | Ref               |          | Ref                         |          |
| psoriasis                | 190 of 117923      | 1.6                                      | 1.59 (1.38,1.84)  | <0.001   | 1.38 (1.19,1.59)            | <0.001   |
| Tobacco                  |                    |                                          |                   |          |                             |          |
| Non-psoriasis            | 16425 of 5642983   | 2.9                                      | Ref               |          | Ref                         |          |
| psoriasis                | 455 of 115916      | 3.9                                      | 1.34 (1.23, 1.48) | <0.001   | 1.15 (1.05,1.26)            | <0.001   |
| Other                    |                    |                                          |                   |          |                             |          |
| Non-psoriasis            | 387 of 5748879     | 0.07                                     | Ref               |          | Ref                         |          |
| psoriasis                | 13 of 118910       | 0.11                                     | 1.62 (0.93, 2.82) | 0.086    | 1.39 (0.80, 2.42)           | 0.240    |

N=446366

CI, confidence interval; HR, hazard ratio.

<sup>a</sup>Presented as events per 1000 person-years.<sup>b</sup>Adjusted for sex, age, ethnicity, Townsend deprivation index, educational level, physical activity, smoking status, alcohol status, and body mass index.

**Table S5** Association of substance abuse with the risk of psoriasis (Excluding non-white populations in Cohort 1).

| Exposures                | Cases/person-years | Cases/1000 person-years <sup>a</sup> | Unadjusted Model  |          | Adjusted Model 1 <sup>b</sup> |          | Adjusted Model 2 <sup>c</sup> |          |
|--------------------------|--------------------|--------------------------------------|-------------------|----------|-------------------------------|----------|-------------------------------|----------|
|                          |                    |                                      | HR (95% CI)       | <i>P</i> | HR (95% CI)                   | <i>P</i> | HR (95% CI)                   | <i>P</i> |
| Substance abuse          |                    |                                      |                   |          |                               |          |                               |          |
| No                       | 3520 of 5356213    | 0.7                                  | Ref               |          | Ref                           |          | Ref                           |          |
| Yes                      | 441 of 265795      | 1.7                                  | 2.49 (2.26, 2.75) | <0.001   | 2.32 (2.10, 2.56)             | <0.001   | 2.33 (2.11, 2.58)             | <0.001   |
| Types of substance abuse |                    |                                      |                   |          |                               |          |                               |          |
| Alcohol                  |                    |                                      |                   |          |                               |          |                               |          |
| No                       | 3887 of 5582425    | 0.7                                  | Ref               |          | Ref                           |          | Ref                           |          |
| Yes                      | 74 of 39581        | 1.9                                  | 2.64 (2.09, 3.32) | <0.001   | 2.28 (1.81, 2.88)             | <0.001   | 2.28 (1.80, 2.87)             | <0.001   |
| Tobacco                  |                    |                                      |                   |          |                               |          |                               |          |
| No                       | 3576 of 5392795    | 0.7                                  | Ref               |          | Ref                           |          | Ref                           |          |
| Yes                      | 385 of 229212      | 1.7                                  | 2.50 (2.25, 2.78) | <0.001   | 2.34 (2.10, 2.60)             | <0.001   | 2.35 (2.12, 2.62)             | <0.001   |
| Other                    |                    |                                      |                   |          |                               |          |                               |          |
| No                       | 3953 of 5615784    | 0.7                                  | Ref               |          | Ref                           |          | Ref                           |          |
| Yes                      | 8 of 6623          | 1.3                                  | 1.80 (0.90, 3.61) | 0.096    | 1.69 (0.84, 3.38)             | 0.139    | 1.67 (0.83, 3.35)             | 0.146    |

N=431942

CI, confidence interval; HR, hazard ratio.

<sup>a</sup>Presented as events per 1000 person-years.<sup>b</sup>Adjusted for sex, age, ethnicity, Townsend deprivation score, educational level, physical activity, and body mass index.<sup>c</sup>Additionally adjusted for polygenic risk scores.

**Table S6** Association of psoriasis with the risk of incident substance abuse (Excluding non-white populations in Cohort 2)

| Outcomes                 | Cases/person-years | Cases per 1000 person-years <sup>a</sup> | Unadjusted Model  |          | Adjusted Model <sup>b</sup> |          |
|--------------------------|--------------------|------------------------------------------|-------------------|----------|-----------------------------|----------|
|                          |                    |                                          | HR (95% CI)       | <i>P</i> | HR (95% CI)                 | <i>P</i> |
| Substance abuse          |                    |                                          |                   |          |                             |          |
| Non-psoriasis            | 23253 of 5339338   | 4.4                                      | Ref               |          | Ref                         |          |
| psoriasis                | 731 of 111976      | 6.5                                      | 1.49 (1.39, 1.61) | <0.001   | 1.28 (1.19, 1.38)           | <0.001   |
| Types of substance abuse |                    |                                          |                   |          |                             |          |
| Alcohol                  |                    |                                          |                   |          |                             |          |
| Non-psoriasis            | 6553 of 5460845    | 1.2                                      | Ref               |          | Ref                         |          |
| psoriasis                | 228 of 115898      | 2.0                                      | 1.64 (1.43, 1.87) | <0.001   | 1.42 (1.25, 1.62)           | <0.001   |
| Tobacco                  |                    |                                          |                   |          |                             |          |
| Non-psoriasis            | 17852 of 5374308   | 3.3                                      | Ref               |          | Ref                         |          |
| psoriasis                | 547 of 113152      | 4.8                                      | 1.45 (1.33, 1.58) | <0.001   | 1.23 (1.13, 1.34)           | <0.001   |
| Other                    |                    |                                          |                   |          |                             |          |
| Non-psoriasis            | 425 of 5498995     | 0.08                                     | Ref               |          | Ref                         |          |
| psoriasis                | 15 of 117226       | 0.13                                     | 1.65 (0.99, 2.76) | 0.056    | 1.35 (0.81, 2.27)           | 0.250    |

N=429048

CI, confidence interval; HR, hazard ratio.

<sup>a</sup>Presented as events per 1000 person-years.<sup>b</sup>Adjusted for sex, age, ethnicity, Townsend deprivation index, educational level, physical activity, smoking status, alcohol status, and body mass index.
